# Supplementary material
Source: PubMed Central journal article supplement (PMC3559199)
Supplement: Supp_Fig1.pdf [file Supp_Fig1.pdf]

# Supplementary Data

## Coefficient plots for the screen trials

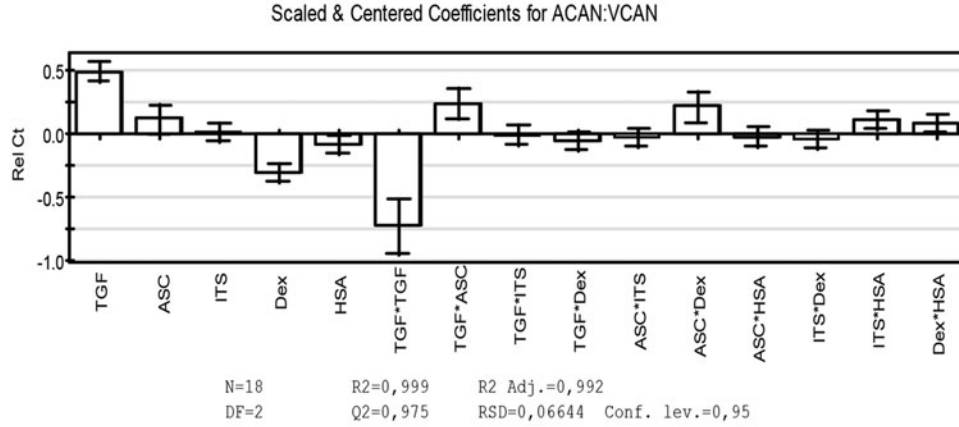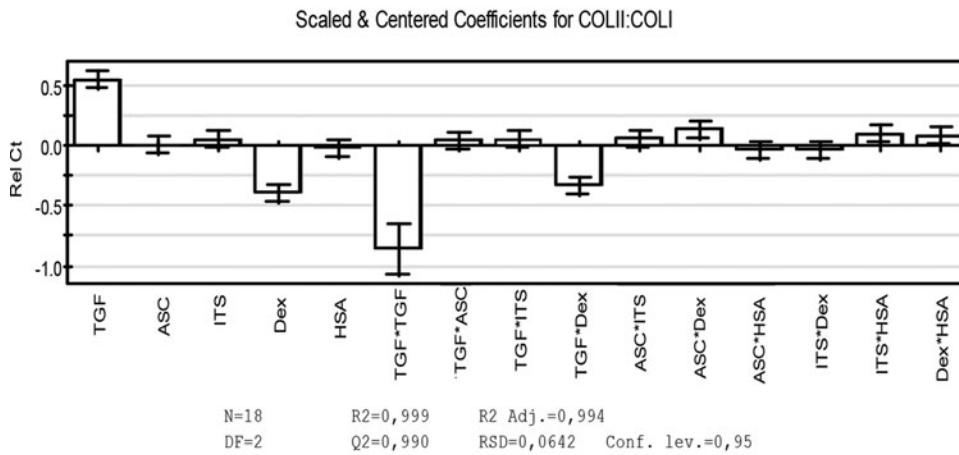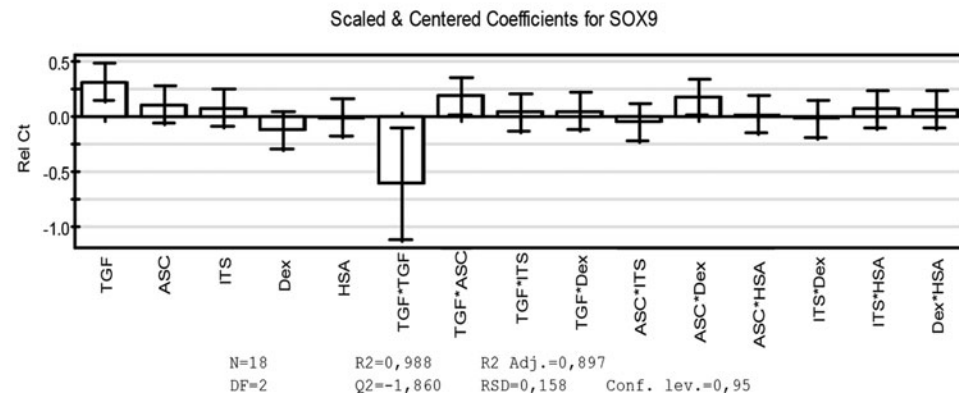

**SUPPLEMENTARY FIG. 1.** Coefficient plots for the screen trials. ASC, ascorbic acid; DEX, dexamethasone; HSA, human serum albumin; ITS, insulin–transferrin–selenium solution; TGF, transforming growth factor  $\beta$ 1.
